# Supplementary material for: Multiple breath washout and oscillometry after allogenic HSCT: a scoping review
Source: PubMed Central journal article supplement — Eur Respir Rev. 2023 Jul 26;32(169):220251. doi: 10.1183/16000617.0251-2022 (PMC10369167; doi:10.1183/16000617.0251-2022), 2023-07-26
Supplement: ERR-0251-2022.SUPPLEMENT.pdf [file ERR-0251-2022.SUPPLEMENT.pdf]

## Supplementary Appendix

### Medline search strategy

Database: Ovid MEDLINE(R) ALL <1946 to March 03, 2022>

Search Strategy:

- 
- 1 exp Bone Marrow Transplantation/ (45339)
  - 2 exp Hematopoietic Stem Cell Transplantation/ (52071)
  - 3 bone marrow transplant\*.mp. (56719)
  - 4 BMT.mp. (10944)
  - 5 h?ematopoietic stem cell transplant\*.mp. (58311)
  - 6 HSCT.mp. (14479)
  - 7 HCT.mp. (17989)
  - 8 SCT.mp. (9751)
  - 9 exp Graft vs Host Disease/ and chronic.mp. (8707)
  - 10 (pulmonary or lung).mp. (1335453)
  - 11 9 and 10 (591)
  - 12 pulmonary chronic graft versus host disease.mp. (13)
  - 13 pulmonary chronic GVHD.mp. (7)
  - 14 pulmonary cGVHD.mp. (15)
  - 15 exp Bronchiolitis Obliterans/ (4002)
  - 16 bronchiolitis obliterans.mp. (4858)
  - 17 obliterative bronchiolitis.mp. (938)
  - 18 BOS.mp. (7937)
  - 19 1 or 2 or 3 or 4 or 5 or 6 or 7 or 8 or 11 or 12 or 13 or 14 or 15 or 16 or 17 or 18 (145288)
  - 20 multiple breath washout.mp. (380)
  - 21 multi-breath washout.mp. (4)
  - 22 inert gas washout.mp. (112)
  - 23 MB?W.mp. (585)
  - 24 lung clearance index.mp. (483)
  - 25 LCI.mp. (1070)
  - 26 Scond.mp. (70)
  - 27 Sacin.mp. (67)
  - 28 ventilat\* inhomogeneity.mp. (272)
  - 29 ventilat\* heterogeneity.mp. (239)
  - 30 exp Airway Resistance/ (13378)
  - 31 exp Oscillometry/ (9991)
  - 32 oscillometry.mp. (10612)
  - 33 forced oscillation technique.mp. (882)
  - 34 FOT.mp. (573)

35 ((airway or lung or pulmonary or respiratory) and (resistance or reactance or impedance)).mp. (103717)

36 20 or 21 or 22 or 23 or 24 or 25 or 26 or 27 or 28 or 29 or 30 or 31 or 32 or 33 or 34 or 35 (115591)

37 19 and 36 (529)
